# Supplementary material for: Water assisted crystallization, gas sensing and photo-electrochemical properties of electrochemically synthesized TiO2nanotube arrays
Source: Royal Society of Chemistry journal article supplement (doi:10.1039/c4ra06842d), 2014-09-23
Supplement: c4ra06842d1.pdf [file c4ra06842d1.pdf]

Manuscript ID RA-ART-07-2014-006842

Supplementary Information

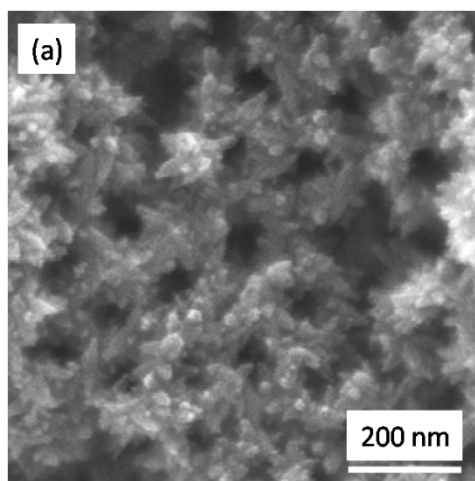

Fig. (S1) FESEM image of water processed TNT at room temperature for 4 days

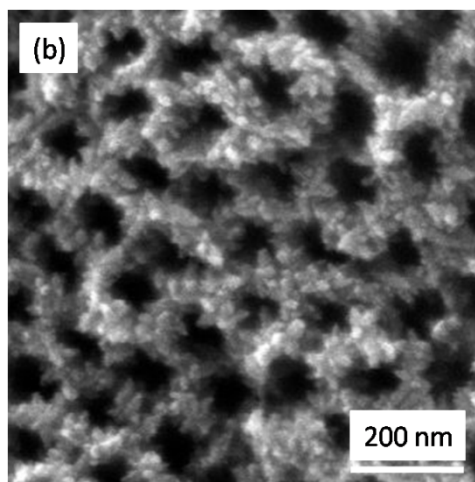

Fig. (S2) FESEM image of water processed TNT at 50 °C for 8 h

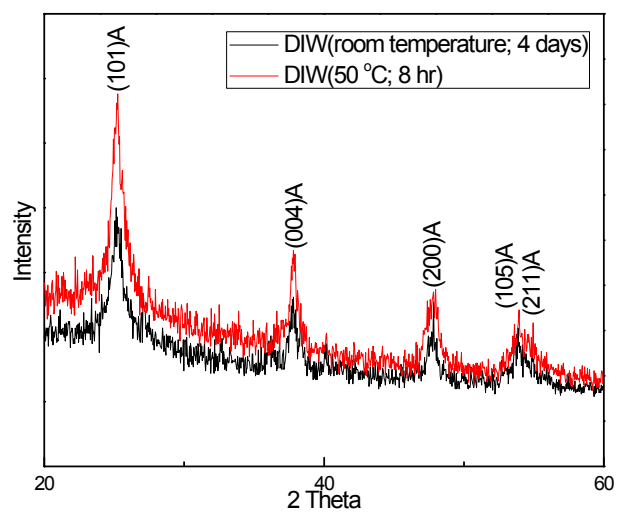

Fig. (S3) XRD pattern of water processed TNT at room temperature for 4 days and 50 °C for 8 h
